# Supplementary material for: Role of Methylation in Period2 (PER2) Transcription in the Context of the Presence or Absence of Light Signals: Natural and Chemical—Studies on the Pig Model
Source: MDPI journal article supplement (doi:10.3390/ijms22157796), 2021-07-21
Supplement: s1 [file s1]

Table S1. Sequences of primers used in experiment

|                                          | Sequence of Primers and Probes                                                                                                           | Gene Bank<br>Accession<br>Number |
|------------------------------------------|------------------------------------------------------------------------------------------------------------------------------------------|----------------------------------|
| qPCR                                     |                                                                                                                                          |                                  |
| <i>Per2</i>                              | Reverse – 5′ CATCTTCCACCGTCTCAAGCT 3′<br>Forward – 5′ AGCATCGGCCTCTAAGATGAAC 3′<br>Probe – 5′[6FAM] ACGTTAGCACGCACTTGACCTCGCTG [TAM]3′   | NC_010457                        |
| <i>Sdha</i>                              | Reverse – 5′ CCAGTTGTCCTCCTCCATGTTT 3′<br>Forward – 5′ CTCTCTGAGGCCGGGTTTAA 3′<br>Probe – 5′[6FAM]TTACGAAGCTCTTTCCCACCAGATCACACA [TAM]3′ | XM_021076930                     |
| Pyrosequencing (bisulfite converted DNA) |                                                                                                                                          |                                  |
| 0—79 bp                                  | Reverse – 5′ TGGAAGGGATTATTTAGGAGGATA-3′<br>Forward – 5′ [BIO] TAACCCTCAAAACCCCCACC-3′<br>Sequencing – 5′GTTTTTATTGAGGAAT-3′             | NC_010457                        |
| –1124—1185 bp                            | Reverse – 5′ [BIO] ACCAATTCCCAAAACCAAATC 3′<br>Forward – 5′ GGGTGTGTTAAGGTGTGATTG 3′<br>Sequencing – 5′ ATTTATGTTTGATGAAGTTGT 3′         |                                  |
| –2000—2054 bp                            | Reverse – 5′ [BIO] ATTTCTA ACAACCTATTTCTCCAA 3′<br>Forward – 5′ AGAGTAAGTAGTGGTTAGTATAATGT 3′<br>Sequencing – 5′ GTTTTATATATAGTTGG 3′    |                                  |
| –2402—2464 bp                            | Reverse – 5′ [BIO] CCCCTAAAACAAACCAAAACTAT 3′<br>Forward – 5′ GGATAGTATTTTAAATAGTTGGGGT 3′<br>Sequencing – 5′ AATTTGAAAGTATAAATG 3′      |                                  |
| Gibson Assembly                          |                                                                                                                                          |                                  |
| long version 2541 bp                     | Reverse – 5′ GCTTTTTGCAAAAGCCTAGGGCCCCATCGCT 3′<br>Forward – 5′ AGAGGAACTTGGTTAGGTACGCTCAGAAAC 3′                                        |                                  |
| short version 1290 bp                    | Reverse – 5′ GCTTTTTGCAAAAGCCTAGGGCCCCATCGCT 3′<br>Forward – 5′ AGAGGAACTTGGTTAGGTACCTGCCAGCCC 3′                                        |                                  |
